# Supplementary material for: Clostridioides difficile in Calves in Central Italy: Prevalence, Molecular Typing, Antimicrobial Susceptibility and Association with Antibiotic Administration
Source: MDPI journal article supplement (doi:10.3390/ani11020515), 2021-02-16
Supplement: s1 [file s1]

## Supplementary data

### File S1. Sampling protocol.

The sampling protocol followed what reported by Hille et al., 2018 [18].

On each farm, the area hosting calves under 60 days of age was divided in three sections: anterior, middle and posterior. Three pooled faecal samples, of at least 10 grams each, were aseptically collected from each of these three sections and immediately put in a sterile container.

The fourth sample consisted of a boot swab sample, which was collected from each calf barn as follows. Boot swabs were commercially available adsorptive polyethylene overboots (Sir Safety System, Assisi, Italy) which were pulled over both feet of the sampling veterinarian. The sampling veterinarian moved across the calf barn, walking along the diagonal of the entire area. On completion of sampling, the boot swabs were carefully removed in order to avoid any losses, inverted to retain of faecal material, and put in a sterile container.

Each sample was individually identified, transported to the laboratory at 4°C and analysed within 12 h from sampling.

**Table S1.** Categorisation of the active principles into the corresponding antimicrobial classes.

| <b>Antimicrobial classes and associations</b> | <b>Active Ingredients (AIs)</b>                                                                   |
|-----------------------------------------------|---------------------------------------------------------------------------------------------------|
| <b>Amphenicols</b>                            |                                                                                                   |
| no association                                | Florfenicol<br>Thiamphenicol                                                                      |
| <b>Aminoglycosides</b>                        |                                                                                                   |
| no association                                | Gentamicin<br>Kanamycin<br>Paromomycin                                                            |
| with Sulfonamides                             | Paromomycin (+ Dihydrostreptomycin)<br>Neomycin (+ Streptomycin)                                  |
| <b>1<sup>st</sup> gen. Cephalosporins</b>     |                                                                                                   |
| no association                                | Cefalexin<br>Cefalexin benzathine<br>Cefalonium<br>Cefapirin<br>Cefapirin benzathine<br>Cefazolin |
| with Aminoglycosides                          | Cefalexin                                                                                         |
| with Rifamycins                               | Cefacetrile                                                                                       |
| <b>3<sup>rd</sup> gen. Cephalosporins</b>     |                                                                                                   |
| no association                                | Cefoperazone<br>Ceftiofur                                                                         |
| <b>4<sup>th</sup> gen. Cephalosporins</b>     |                                                                                                   |
| no association                                | Cefquinome                                                                                        |
| <b>Quinolones</b>                             |                                                                                                   |
| no association                                | Flumequine                                                                                        |
| <b>Fluoroquinolones</b>                       |                                                                                                   |
| no association                                | Danofloxacin<br>Enrofloxacin<br>Marbofloxacin                                                     |
| <b>Lincosamides</b>                           |                                                                                                   |
| with Aminoglycosides                          | Lincomycin                                                                                        |
| <b>Macrolides</b>                             |                                                                                                   |
| no association                                | Gamithromycin<br>Spiramycin<br>Tilmicosin<br>Tylosin<br>Tulathromycin                             |
| with Sulfonamides                             | Erythromycin                                                                                      |

|                      |                                                                                                                                                                                                    |
|----------------------|----------------------------------------------------------------------------------------------------------------------------------------------------------------------------------------------------|
| <b>Penicillins</b>   |                                                                                                                                                                                                    |
| no association       | Amoxicillin<br>Ampicillin<br>Procaine benzylpenicillin<br>Cloxacillin<br>Cloxacillin benzathine<br>Penethamate hydriodide<br>Ampicillin (+ Cloxacillin benzathine)<br>Ampicillin (+ Dicloxacillin) |
| with Clavulanic Acid | Amoxicillin                                                                                                                                                                                        |
| with Aminoglycosides | Benzylpenicillin<br>Procaine benzylpenicillin<br>Procaine benzylpenicillin (+ Nafcillin)<br>Penethamate hydriodide (+ Benethamine benzylpenicillin)                                                |
| with Polymyxins      | Amoxicillin                                                                                                                                                                                        |
| <b>Rifamycine</b>    |                                                                                                                                                                                                    |
| no association       | Rifaximin                                                                                                                                                                                          |
| <b>Sulfonamides</b>  |                                                                                                                                                                                                    |
| no association       | Sulfamethoxyipyridazine<br>Sulfadimidine (+ Sulfamerazine + Sulfathiazole)                                                                                                                         |
| with Trimethoprim    | Sulfadiazine<br>Sulfadimethoxine<br>Sulfadimidine<br>Sulfamonomethoxine                                                                                                                            |
| <b>Tetracyclines</b> |                                                                                                                                                                                                    |
| no association       | Doxycycline<br>Oxytetracycline                                                                                                                                                                     |
| with Penicillins     | Chlortetracycline                                                                                                                                                                                  |

**Table S2.** Distribution of farms according to the breeding system and the herd size. The stratum-specific ORs are shown.

| <b>Breeding system/<br/>herd size</b> | <b>Number<br/>of farms</b> | <b>Presence of<br/><i>C. difficile</i></b> | <b>CI95%</b> | <b>OR</b>         | <b>P-value</b> |
|---------------------------------------|----------------------------|--------------------------------------------|--------------|-------------------|----------------|
| <b>Beef</b>                           |                            |                                            |              |                   |                |
| 50-99                                 | 29                         | 5 (17.2%)                                  | 0%-35.3%     | -                 | -              |
| 100-199                               | 15                         | 2 (13.3%)                                  | 0%-35.9%     | 0.74 (0.13-4.35)  | 1              |
| ≥200                                  | 10                         | 3 (30%)                                    | 0%-67.3%     | 2.06 (0.39-10.83) | 0.3989         |
| <b>Milk</b>                           |                            |                                            |              |                   |                |
| 50-99                                 | 19                         | 4 (21.1%)                                  | 0%-45%       | -                 | -              |
| 100-199                               | 13                         | 5 (38.5%)                                  | 3.7%-73.2%   | 2.34 (0.49-11.26) | 0.4269         |
| ≥200                                  | 15                         | 1 (6.7%)                                   | 0%-23.26%    | 0.27 (0.02-2.69)  | 0.3547         |

**Table S3.** Distribution of antimicrobial classes prescribed on farms and association with *C. difficile*-positive farms. Data on associations of different antimicrobial classes are not shown because they were not significant.

| Antimicrobial class prescribed on farm         | N° of farms | <i>C. difficile</i> positive farms (%) | CI 95%      | P-value |
|------------------------------------------------|-------------|----------------------------------------|-------------|---------|
| <b>Amphenicols</b>                             |             |                                        |             | 0.670   |
| Yes                                            | 13          | 2 (15.4%)                              | 0%-35%      |         |
| No                                             | 88          | 18 (20.5%)                             | 12%-28.9%   |         |
| <b>Aminoglycosides</b>                         |             |                                        |             | 0.261   |
| Yes                                            | 30          | 8 (26.7%)                              | 10.9%-42.5% |         |
| No                                             | 71          | 12 (16.9%)                             | 8.2%-25.6%  |         |
| <b>1<sup>ST</sup> gen. Cephalosporins</b>      |             |                                        |             | 0.626   |
| Yes                                            | 35          | 6 (17.1%)                              | 4.7%-29.6%  |         |
| No                                             | 66          | 14 (21.2%)                             | 11.4%-31.1% |         |
| <b>3<sup>RD</sup> gen. Cephalosporins</b>      |             |                                        |             | 0.727   |
| Yes                                            | 37          | 8 (21.6%)                              | 8.4%-34.9%  |         |
| No                                             | 64          | 12 (18.8%)                             | 9.2%-28.3%  |         |
| <b>4<sup>TH</sup> gen. Cephalosporins</b>      |             |                                        |             | 0.887   |
| Yes                                            | 29          | 6 (20.7%)                              | 6%-35.4%    |         |
| No                                             | 72          | 14 (19.4%)                             | 10.3%-28.6% |         |
| <b>Quinolones</b>                              |             |                                        |             |         |
| Yes                                            | 1           | 0 (0%)                                 |             |         |
| No                                             | 100         | 20 (20%)                               | 12.2%-27.8% |         |
| <b>Fluoroquinolones</b>                        |             |                                        |             | 0.699   |
| Yes                                            | 67          | 14 (20.9%)                             | 11.2%-30.6% |         |
| No                                             | 34          | 6 (17.7%)                              | 4.8%-30.5%  |         |
| <b>Lincosamides<br/>(with aminoglycosides)</b> |             |                                        |             | 0.940   |
| Yes                                            | 31          | 6 (19.3%)                              | 5.5%-33.3%  |         |
| No                                             | 70          | 14 (20%)                               | 10.6%-29.4% |         |
| <b>Macrolides</b>                              |             |                                        |             | 0.396   |
| Yes                                            | 42          | 10 (23.8%)                             | 10.9%-36.7% |         |
| No                                             | 59          | 10 (16.9%)                             | 7.4%-26.5%  |         |
| <b>Penicillins</b>                             |             |                                        |             | 0.027*  |
| Yes                                            | 68          | 18 (26.5%)                             | 16%-37%     |         |
| No                                             | 33          | 2 (6.1%)                               | 0%-14.2%    |         |
| <b>Rifamycins</b>                              |             |                                        |             | 0.419   |
| Yes                                            | 28          | 7 (25%)                                | 9%-41%      |         |
| No                                             | 73          | 13 (17.8%)                             | 9%-26.6%    |         |
| <b>Sulfonamides</b>                            |             |                                        |             |         |
| Yes                                            | 5           | 0 (0%)                                 |             |         |
| No                                             | 96          | 20 (20.8%)                             | 12.7%-29%   |         |
| <b>Tetracyclines</b>                           |             |                                        |             | 0.341   |
| Yes                                            | 41          | 10 (24.4%)                             | 11.3%-37.5% |         |
| No                                             | 60          | 10 (16.7%)                             | 7.2%-26.1%  |         |

**Table S4.** Descriptive statistics relating to the average number of treated animals for each antibiotic class. Data on associations are not shown.

| <b>Antimicrobial class/prescribed on farm</b>  | <b>Number of treated animals/100 animals (±SD)</b> | <b>P-value</b> |
|------------------------------------------------|----------------------------------------------------|----------------|
| <b>Amphenicols</b>                             |                                                    | 0.6764         |
| <i>C. difficile</i> positive farms             | 0.016 (±0.67)                                      |                |
| <i>C. difficile</i> negative farms             | 0.0123 (±0.0386)                                   |                |
| <b>Aminoglycosides</b>                         |                                                    | 0.116          |
| <i>C. difficile</i> positive farms             | 0.0714 (±0.1083)                                   |                |
| <i>C. difficile</i> negative farms             | 0.027 (±0.0594)                                    |                |
| <b>1<sup>ST</sup> gen. Cephalosporins</b>      |                                                    | 0.3908         |
| <i>C. difficile</i> positive farms             | 0.0169 (±0.0824)                                   |                |
| <i>C. difficile</i> negative farms             | 0.0457 (±0.0823)                                   |                |
| <b>3<sup>RD</sup> gen. Cephalosporins</b>      |                                                    | 0.9567         |
| <i>C. difficile</i> positive farms             | 0.0372 (±0.0986)                                   |                |
| <i>C. difficile</i> negative farms             | 0.0417 (±0.0908)                                   |                |
| <b>4<sup>TH</sup> gen. Cephalosporins</b>      |                                                    | 0.8812         |
| <i>C. difficile</i> positive farms             | 0.0475 (±0.1253)                                   |                |
| <i>C. difficile</i> negative farms             | 0.0424 (±0.1505)                                   |                |
| <b>Quinolones</b>                              |                                                    | 0.6193         |
| <i>C. difficile</i> positive farms             | 0                                                  |                |
| <i>C. difficile</i> negative farms             | 0.0002 (±0.0014)                                   |                |
| <b>Fluoroquinolones</b>                        |                                                    | 0.2015         |
| <i>C. difficile</i> positive farms             | 0.0806 (±0.0855)                                   |                |
| <i>C. difficile</i> negative farms             | 0.054 (±0.0873)                                    |                |
| <b>Lincosamides<br/>(with aminoglycosides)</b> |                                                    | 0.8839         |
| <i>C. difficile</i> positive farms             | 0.0273 (±0.0619)                                   |                |
| <i>C. difficile</i> negative farms             | 0.0176 (±0.0412)                                   |                |
| <b>Macrolides</b>                              |                                                    | 0.8415         |
| <i>C. difficile</i> positive farms             | 0.038 (±0.0646)                                    |                |
| <i>C. difficile</i> negative farms             | 0.0552 (±0.0957)                                   |                |
| <b>Penicillins<sup>1</sup></b>                 |                                                    | <b>0.0215*</b> |
| <i>C. difficile</i> positive farms             | 0.1076 (±0.1439)                                   |                |
| <i>C. difficile</i> negative farms             | 0.0642 (±0.1069)                                   |                |
| <b>Rifamycins</b>                              |                                                    | 0.2846         |
| <i>C. difficile</i> positive farms             | 0.0123 (±0.0194)                                   |                |
| <i>C. difficile</i> negative farms             | 0.0094 (±0.0203)                                   |                |
| <b>Sulfonamides</b>                            |                                                    | 0.257          |
| <i>C. difficile</i> positive farms             | 0                                                  |                |
| <i>C. difficile</i> negative farms             | 0.0045 (±0.0241)                                   |                |
| <b>Tetracyclines</b>                           |                                                    | 0.4235         |
| <i>C. difficile</i> positive farms             | 0.0001 (±0.0006)                                   |                |
| <i>C. difficile</i> negative farms             | 0.0001 (±0.0006)                                   |                |
